# Supplementary material for: Regulation of heterotopic ossification through local inflammatory monocytes in a mouse model of aberrant wound healing
Source: bioRxiv or medRxiv preprint supplement (doi:10.1101/871574), 2019-12-11
Supplement: Supplementary file [file media-1.pdf]

**Supplemental Figure 1.** Plasma cyto/chemokine levels. Data are shown as the median and interquartile range.

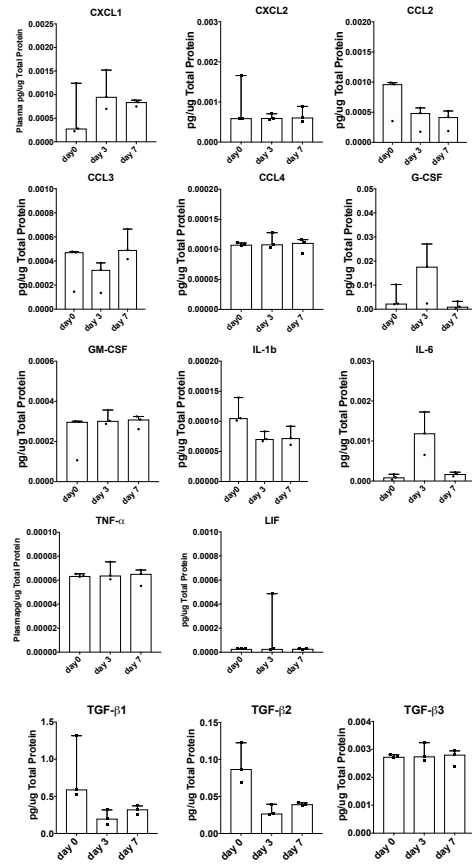

Changes in cytokines and chemokines across day 3 and day 7 vs day 0 were analyzed by an analysis of variance (ANOVA) with post-hoc Dunnett test (n=3 mice/time point). Non-heteroscedastic data identified by Levene's test for homogeneity of variances were alternatively analyzed by Welch statistic and post-hoc Dunnett T3. Degrees of freedom (df or df1) across samples = 2. F statistic and significant post-hoc p-values respectively:

CXCL1: 0.587, CXCL2: 0.388, CCL2: 1.259, CCL3: 2.295, CCL4: 0.178, G-CSF: 2.736, GM-CSF: 1.099, IL-1b: 6.732, p(D0 vs. D3)=0.032, p(D0 vs. D7)=0.036, IL-6: 11.394, p(D0 vs. D3)=0.009, TNF-α: 0.303, TGF-β1: 2.746, p(D0 vs. D3)=0.009, TGF-β2: 12.294, p(D0 vs. D3)=0.027, p(D0 vs. D7)=0.007, TGF-β3: 0.303, LIF: .994. \*p < .05 \*\*p < .01.

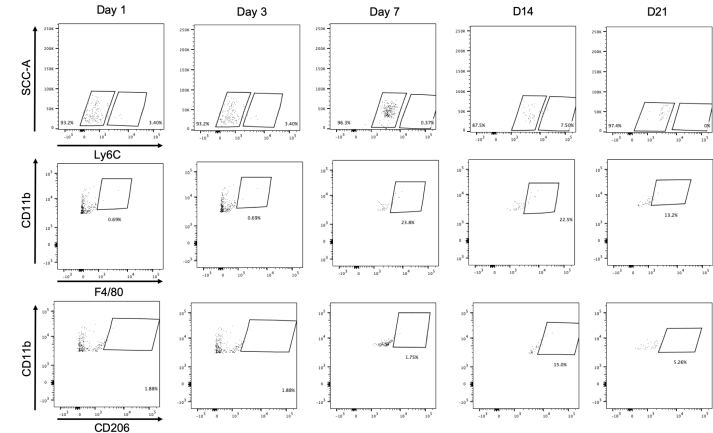

**Supplemental Figure 2.** Negative gates of HO site flow cytometry. Flow cytometry plots showing negative gating strategy for Ly6C, F4/80 and CD206 across the individual time points.

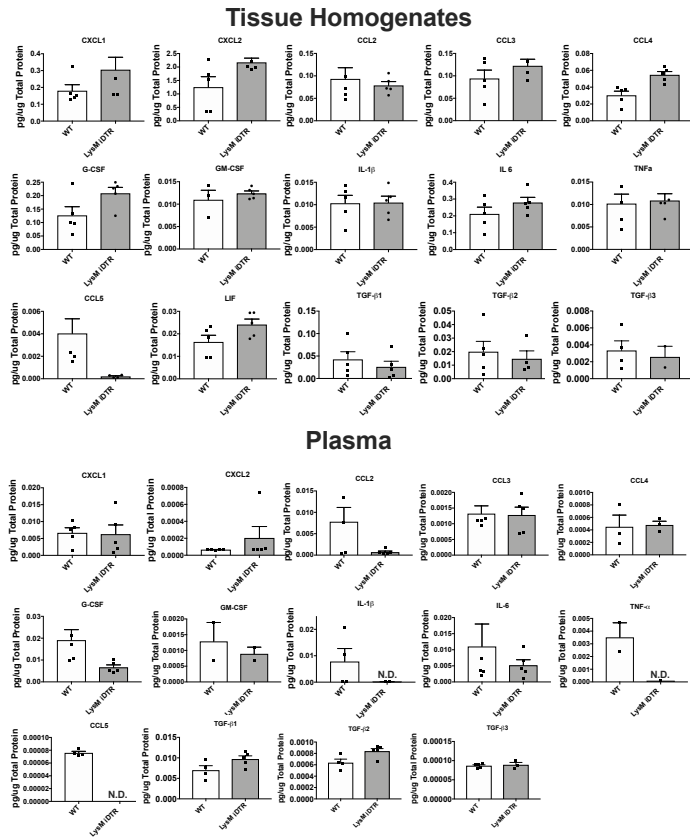

**Supplemental Figure 3.** Homogenate and Plasma levels of cytokines/chemokines after monocyte depletion using *LysMCre-iDTR* or control WT mice (n=5 mice/group). Injury site homogenate and plasma at day 3 from *LysMCre-iDTR* and litter mate control mice, where monocytes/macrophages were depleted by pre-injection of diphtheria toxin (DT) two days before the B/T, the day of B/T and at day 2 after the B/T.

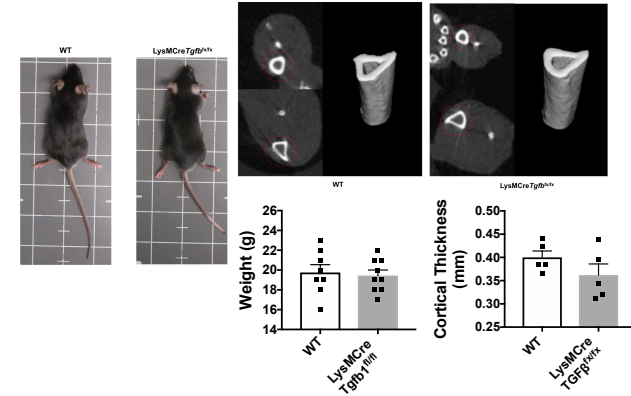

**Supplemental Figure 4.** *LysMCre/Tgfb1<sup>fl/fl</sup>* and wild type mice do not differ in size, weight, or tibial thickness. A. Top: images of wild type and *LysMCre/Tgfb1<sup>fl/fl</sup>* mice. Bottom: mean weights from mice in either WT or *LysMCre/Tgfb1<sup>fl/fl</sup>* groups. B. Quantification of mean cortical tibial thickness from MicroCT scans of WT and *LysMCre/Tgfb1<sup>fl/fl</sup>* mice (n=5/group, t=-0.121, df=8, p=0.907)

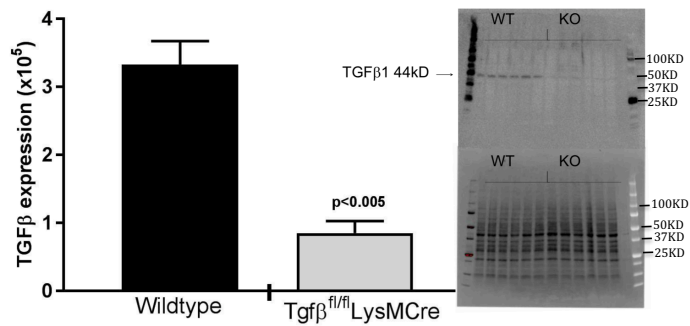

**Supplemental Figure 5.** TGF- $\beta$ 1 expression is reduced in LysMCre-*Tgfb1*<sup>fl/fl</sup> bone marrow derived macrophages. Bone marrow was flushed from 4-week-old WT (C57B6) or KO (LysMCre-*Tgfb1*<sup>fl/fl</sup>) mice and macrophages induced in culture with 30ng/ml M-CSF for 5 days. Western blot revealed a significant decrease in TGF- $\beta$ 1. Graph represents TGF- $\beta$ 1 expression (seen in Western blot; right, top panel) normalized to loading signal (right, bottom panel). n=3/gp (run in duplicate; t test: p=0.0004, t=11.15, df=4) error bars represent SD.

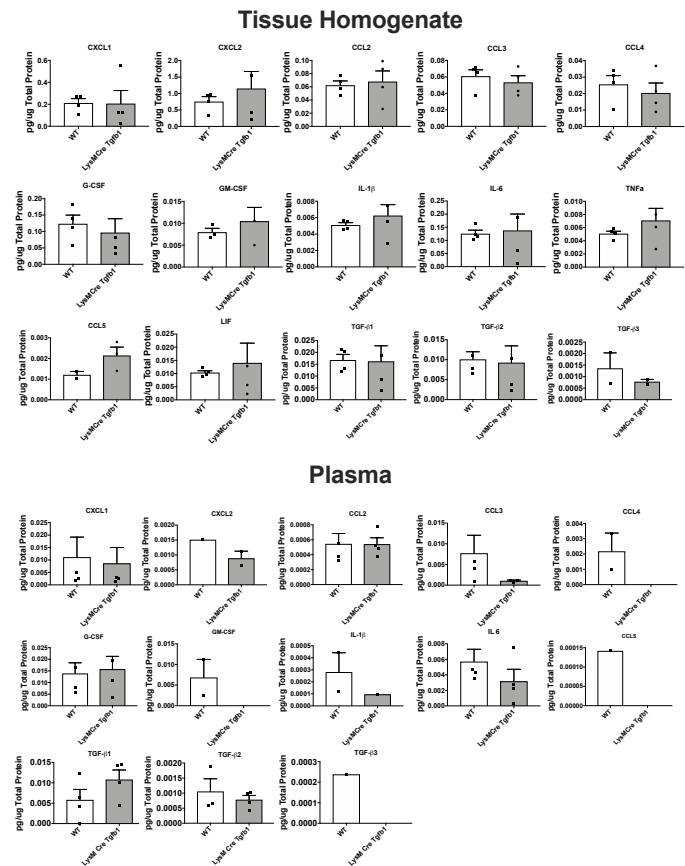

**Supplemental Figure 6.** Homogenate and Plasma levels of cytokines/chemokines after monocyte depletion using LysMCre-*Tgfb1*<sup>fl/fl</sup> mice (n=4 mice/group).

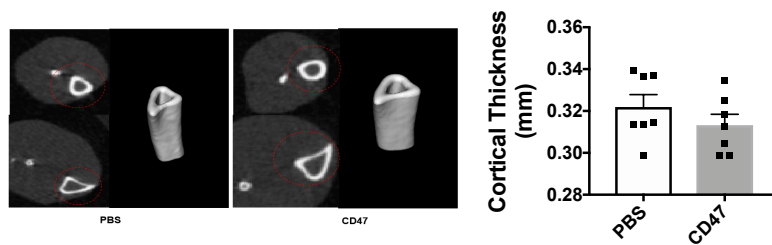

**Supplemental Figure 7.** Treatment with CD47 activating peptide p7N3 does not result in changes in tibial thickness of mice. Top: Quantification of mean cortical tibial thickness from MicroCT scans (n=7/group, t=1.103, df=12, p=0.292). Bottom: Representative MicroCT scan images from tibias of PBS and CD47 peptide (p7N3) treated mice.

**Supplemental Table 1:** Top gene expression of day 3 TGF- $\beta$  expressing clusters.

| p_val     | avg_logFC  | pct.1 | pct.2 | p_val_adj | cluster | gene     |
|-----------|------------|-------|-------|-----------|---------|----------|
| 0         | 1.47036156 | 0.979 | 0.66  | 0         | 0       | Plac8    |
| 0         | 1.32737263 | 0.907 | 0.353 | 0         | 0       | Ifitm6   |
| 3.73E-179 | 1.31302633 | 0.817 | 0.512 | 6.57E-175 | 0       | Chil3    |
| 4.79E-299 | 1.15385338 | 0.848 | 0.343 | 8.43E-295 | 0       | Ly6c2    |
| 1.97E-266 | 1.07680069 | 0.98  | 0.844 | 3.47E-262 | 0       | Thbs1    |
| 0         | 1.06899311 | 0.983 | 0.68  | 0         | 0       | Hp       |
| 0         | 1.02867456 | 0.967 | 0.623 | 0         | 0       | Gsr      |
| 0         | 0.98573785 | 0.825 | 0.316 | 0         | 0       | Vcan     |
| 2.27E-288 | 0.94741447 | 0.832 | 0.315 | 3.99E-284 | 0       | F10      |
| 4.51E-283 | 0.94567273 | 0.77  | 0.221 | 7.94E-279 | 0       | Gm9733   |
| 0         | 2.4728712  | 0.84  | 0.292 | 0         | 1       | Arg1     |
| 5.01E-158 | 2.05073848 | 0.97  | 0.884 | 8.81E-154 | 1       | Spp1     |
| 3.25E-66  | 1.63075966 | 0.512 | 0.29  | 5.72E-62  | 1       | Cxcl3    |
| 5.61E-37  | 1.12059119 | 0.165 | 0.048 | 9.87E-33  | 1       | Mmp12    |
| 5.00E-108 | 1.06784211 | 0.988 | 0.947 | 8.81E-104 | 1       | Pf4      |
| 3.52E-133 | 1.05879712 | 0.989 | 0.936 | 6.20E-129 | 1       | Ctsl     |
| 2.60E-160 | 1.02772177 | 0.865 | 0.568 | 4.58E-156 | 1       | Hilpda   |
| 4.69E-17  | 1.02137961 | 0.228 | 0.128 | 8.25E-13  | 1       | Pbbp     |
| 4.31E-81  | 0.9504383  | 0.49  | 0.215 | 7.59E-77  | 1       | Cd36     |
| 3.46E-178 | 0.9223303  | 0.988 | 0.899 | 6.10E-174 | 1       | Mif      |
| 1.72E-86  | 0.77324378 | 0.933 | 0.832 | 3.03E-82  | 3       | H2-Aa    |
| 3.61E-111 | 0.76874144 | 0.997 | 0.974 | 6.36E-107 | 3       | Cd74     |
| 3.40E-78  | 0.72232396 | 0.906 | 0.748 | 5.99E-74  | 3       | H2-Eb1   |
| 1.79E-149 | 0.67948462 | 0.991 | 0.816 | 3.14E-145 | 3       | Aif1     |
| 4.87E-164 | 0.66808656 | 1     | 0.921 | 8.57E-160 | 3       | Ctsc     |
| 3.51E-87  | 0.6639899  | 0.96  | 0.898 | 6.18E-83  | 3       | H2-Ab1   |
| 3.39E-86  | 0.59492665 | 0.978 | 0.911 | 5.98E-82  | 3       | Marcks11 |
| 4.67E-123 | 0.57249586 | 0.974 | 0.758 | 8.22E-119 | 3       | AF251705 |
| 4.22E-79  | 0.52282696 | 0.993 | 0.949 | 7.44E-75  | 3       | Tgfb1    |
| 1.81E-88  | 0.51670001 | 0.979 | 0.716 | 3.19E-84  | 3       | Ccr2     |

**Supplemental Table 2:** Common Macrophage Subsets at HO site in PBS and CD47 activating peptide treatment.

| Cluster # |      | Gene   |   |       |
|-----------|------|--------|---|-------|
| PBS       | CD47 |        |   |       |
| 4         | 1    | Spp1   |   |       |
|           |      | Arg1   |   |       |
|           |      | Lgals3 |   |       |
|           |      | Cstb   |   |       |
|           |      | Cd36   |   |       |
|           |      | Prdx1  |   |       |
|           |      | Mmp12  |   |       |
|           |      | 3      | 3 | Plac8 |
|           |      |        |   | Ccr2  |
|           |      |        |   | Cd52  |
| Il1b      |      |        |   |       |
| H2-Eb1    |      |        |   |       |
| H2-Aa     |      |        |   |       |
| 1         | 2    | Sepp1  |   |       |
|           |      | C1qa   |   |       |
|           |      | ApoE   |   |       |
|           |      | C1qb   |   |       |
|           |      | C1qc   |   |       |
|           |      | Aif1   |   |       |
|           |      | Trem2  |   |       |
|           |      | Lyz2   |   |       |

**Supplemental Table 3:** Unique Macrophage Subsets at HO site with CD47 activating peptide treatment

| Gene        | Avg. Fold Change | % Expression in cluster | % Expression all other clusters | Adjusted p-val | Cluster # |
|-------------|------------------|-------------------------|---------------------------------|----------------|-----------|
| <b>PBS</b>  |                  |                         |                                 |                |           |
| Ccl4        | 1.92741015       | 0.594                   | 0.175                           | 1.89E-171      | 9         |
| Ccl3        | 1.428509938      | 0.544                   | 0.125                           | 4.42E-194      | 9         |
| Mrc1        | 1.325374474      | 0.847                   | 0.249                           | 9.71E-263      | 9         |
| Cd83        | 1.305317037      | 0.797                   | 0.189                           | 1.29E-302      | 9         |
| Isg15       | 2.096509936      | 0.908                   | 0.2                             | 5.41E-177      | 12        |
| Ccl12       | 1.981830311      | 0.638                   | 0.093                           | 6.41E-153      | 12        |
| Ifit3       | 1.893926081      | 0.85                    | 0.058                           | 0              | 12        |
| Irf7        | 1.803168506      | 0.932                   | 0.187                           | 1.11E-197      | 12        |
| Fcgr1       | 1.502130958      | 0.937                   | 0.243                           | 6.60E-152      | 12        |
| Ifit1       | 1.44619128       | 0.643                   | 0.059                           | 4.30E-247      | 12        |
| <b>CD47</b> |                  |                         |                                 |                |           |
| Folr2       | 1.688539551      | 0.671                   | 0.099                           | 0              | 6         |
| Mrc1        | 1.623389766      | 0.925                   | 0.243                           | 0              | 6         |
| Ccl12       | 1.615203405      | 0.58                    | 0.077                           | 0              | 6         |
| Cbr2        | 1.444270202      | 0.629                   | 0.071                           | 0              | 6         |
| F13a1       | 1.294819395      | 0.765                   | 0.203                           | 0              | 6         |
| Fcrls       | 1.281069482      | 0.699                   | 0.092                           | 0              | 6         |
| Clec10a     | 1.234401091      | 0.603                   | 0.126                           | 2.6929E-301    | 6         |
| Cxcl3       | 4.773273925      | 0.963                   | 0.1                             | 4.6591E-167    | 12        |
| Ccl3        | 4.597986709      | 1                       | 0.22                            | 3.71915E-95    | 12        |
| Csf3        | 3.566634486      | 0.768                   | 0.022                           | 0              | 12        |
| Serp1b2     | 3.413322798      | 0.707                   | 0.011                           | 0              | 12        |
| Il1a        | 3.274139858      | 0.976                   | 0.022                           | 0              | 12        |
| Arg1        | 2.644316173      | 0.939                   | 0.114                           | 1.8472E-131    | 12        |
| Il1rn       | 2.623427277      | 0.915                   | 0.218                           | 7.91127E-72    | 12        |
| Nos2        | 2.210727868      | 0.78                    | 0.01                            | 0              | 12        |
| Inhba       | 2.065551886      | 0.805                   | 0.063                           | 1.3879E-168    | 12        |
| Egln3       | 1.497285254      | 0.72                    | 0.022                           | 0              | 12        |
| Ero11       | 1.483284038      | 0.841                   | 0.19                            | 1.16011E-66    | 12        |

**Supplemental Table 4:** Taqman primer/probe assays used for QPCR.

| Gene                          |     | Lot     | Assay ID      |
|-------------------------------|-----|---------|---------------|
| <i>Gapdh</i>                  | FAM | 1593842 | Mm99999915_g1 |
| <i>Nos1</i>                   | FAM | 1732158 | Mm01208059_m1 |
| <i>Arg1</i>                   | FAM | 1712842 | Mm00475988_m1 |
| <i>Mrc1</i>                   | FAM | 1721427 | Mm01329362_m1 |
| <i>Tgf<math>\beta</math>1</i> | FAM | 1730281 | Mm01178820_m1 |
